# Supplementary material
Source: PubMed Central journal article supplement (PMC4960429)

**Supplemental Table 1:** risperidone, haloperidol and chlorpromazine equivalents derived from the DDD method

| Drug             | DDDs          |                     |                | Doses equivalent to 1mg oral risperidone |                               |                          | Doses equivalent to 1mg oral haloperidol |                               |                          | Doses equivalent to 100mg oral chlorpromazine |                                 |                            |
|------------------|---------------|---------------------|----------------|------------------------------------------|-------------------------------|--------------------------|------------------------------------------|-------------------------------|--------------------------|-----------------------------------------------|---------------------------------|----------------------------|
|                  | DDD Oral form | DDD Parenteral form | DDD Depot form | RIS 1mg equ (Oral form)                  | RIS 1mg equ (Parenteral form) | RIS 1mg equ (Depot form) | HAL 1mg equ (Oral form)                  | HAL 1mg equ (Parenteral form) | HAL 1mg equ (Depot form) | CPZ 100mg equ (Oral form)                     | CPZ 100mg equ (Parenteral form) | CPZ 100mg equ (Depot form) |
| Acepromazine     | 100,00        | 50,00               |                | 20,00                                    | 10,00                         |                          | 12,50                                    | 6,25                          |                          | 33,33                                         | 16,67                           |                            |
| Acetophenazine   | 50,00         |                     |                | 10,00                                    |                               |                          | 6,25                                     |                               |                          | 16,67                                         |                                 |                            |
| Amisulpride      | 400,00        |                     |                | 80,00                                    |                               |                          | 50,00                                    |                               |                          | 133,33                                        |                                 |                            |
| Aripiprazole     | 15,00         | 15,00               |                | 3,00                                     | 3,00                          |                          | 1,88                                     | 1,88                          |                          | 5,00                                          | 5,00                            |                            |
| Asenapine        | 20,00         |                     |                | 4,00                                     |                               |                          | 2,50                                     |                               |                          | 6,67                                          |                                 |                            |
| Benperidol       | 1,50          |                     |                | 0,30                                     |                               |                          | 0,19                                     |                               |                          | 0,50                                          |                                 |                            |
| Bromperidol      | 10,00         | 10,00               | 3,30           | 2,00                                     | 2,00                          | 0,66                     | 1,25                                     | 1,25                          | 0,41                     | 3,33                                          | 3,33                            | 1,10                       |
| Butaperazine     | 10,00         |                     |                | 2,00                                     |                               |                          | 1,25                                     |                               |                          | 3,33                                          |                                 |                            |
| Cariprazine      |               |                     |                |                                          |                               |                          |                                          |                               |                          |                                               |                                 |                            |
| Chlorproethazine |               |                     |                |                                          |                               |                          |                                          |                               |                          |                                               |                                 |                            |
| Chlorpromazine   | 300,00        | 100,00              |                | 60,00                                    | 20,00                         |                          | 37,50                                    | 12,50                         |                          | 100,00                                        | 33,33                           |                            |
| Chlorprothixene  | 300,00        | 50,00               |                | 60,00                                    | 10,00                         |                          | 37,50                                    | 6,25                          |                          | 100,00                                        | 16,67                           |                            |
| Clopentixol      | 100,00        | 100,00              |                | 20,00                                    | 20,00                         |                          | 12,50                                    | 12,50                         |                          | 33,33                                         | 33,33                           |                            |
| Clotiapine       | 80,00         | 80,00               |                | 16,00                                    | 16,00                         |                          | 10,00                                    | 10,00                         |                          | 26,67                                         | 26,67                           |                            |
| Clozapine        | 300,00        | 300,00              |                | 60,00                                    | 60,00                         |                          | 37,50                                    | 37,50                         |                          | 100,00                                        | 100,00                          |                            |
| Cyamemazine      |               |                     |                |                                          |                               |                          |                                          |                               |                          |                                               |                                 |                            |
| Dixyrazine       | 50,00         | 30,00               |                | 10,00                                    | 6,00                          |                          | 6,25                                     | 3,75                          |                          | 16,67                                         | 10,00                           |                            |
| Droperidol       |               | 2,50                |                |                                          | 0,50                          |                          |                                          | 0,31                          |                          |                                               | 0,83                            |                            |
| Fluanisone       |               |                     |                |                                          |                               |                          |                                          |                               |                          |                                               |                                 |                            |
| Flupentixol      | 6,00          |                     | 4,00           | 1,20                                     |                               | 0,80                     | 0,75                                     |                               | 0,50                     | 2,00                                          |                                 | 1,33                       |
| Fluphenazine     | 10,00         |                     | 1,00           | 2,00                                     |                               | 0,20                     | 1,25                                     |                               | 0,13                     | 3,33                                          |                                 | 0,33                       |
| Fluspirilene     |               |                     | 0,70           |                                          |                               | 0,14                     |                                          |                               | 0,09                     |                                               |                                 | 0,23                       |

|                  |         |        |       |        |        |      |        |        |      |        |        |      |
|------------------|---------|--------|-------|--------|--------|------|--------|--------|------|--------|--------|------|
| Haloperidol      | 8,00    | 8,00   | 3,30  | 1,60   | 1,60   | 0,66 | 1,00   | 1,00   | 0,41 | 2,67   | 2,67   | 1,10 |
| Iloperidone      |         |        |       |        |        |      |        |        |      |        |        |      |
| Levomepromazine  | 300,00  | 100,00 |       | 60,00  | 20,00  |      | 37,50  | 12,50  |      | 100,00 | 33,33  |      |
| Levosulpiride    | 400,00  |        |       | 80,00  |        |      | 50,00  |        |      | 133,33 |        |      |
| Loxapine         | 100,00  |        |       | 20,00  |        |      | 12,50  |        |      | 33,33  |        |      |
| Lurasidone       | 60,00   |        |       | 12,00  |        |      | 7,50   |        |      | 20,00  |        |      |
| Melperone        | 300,00  | 300,00 |       | 60,00  | 60,00  |      | 37,50  | 37,50  |      | 100,00 | 100,00 |      |
| Mesoridazine     | 200,00  | 200,00 |       | 40,00  | 40,00  |      | 25,00  | 25,00  |      | 66,67  | 66,67  |      |
| Molindone        | 50,00   |        |       | 10,00  |        |      | 6,25   |        |      | 16,67  |        |      |
| Moperone         | 20,00   | 20,00  |       | 4,00   | 4,00   |      | 2,50   | 2,50   |      | 6,67   | 6,67   |      |
| Mosapramine      |         |        |       |        |        |      |        |        |      |        |        |      |
| Olanzapine       | 10,00   | 10,00  | 10,00 | 2,00   | 2,00   | 2,00 | 1,25   | 1,25   | 1,25 | 3,33   | 3,33   | 3,33 |
| Oxypertine       | 120,00  |        |       | 24,00  |        |      | 15,00  |        |      | 40,00  |        |      |
| Paliperidone     | 6,00    |        | 2,50  | 1,20   |        | 0,50 | 0,75   |        | 0,31 | 2,00   |        | 0,83 |
| Penfluridol      | 6,00    |        |       | 1,20   |        |      | 0,75   |        |      | 2,00   |        |      |
| Perazine         | 100,00  | 100,00 |       | 20,00  | 20,00  |      | 12,50  | 12,50  |      | 33,33  | 33,33  |      |
| Periciazine      | 50,00   | 20,00  |       | 10,00  | 4,00   |      | 6,25   | 2,50   |      | 16,67  | 6,67   |      |
| Perphenazine     | 30,00   | 10,00  | 7,00  | 6,00   | 2,00   | 1,40 | 3,75   | 1,25   | 0,88 | 10,00  | 3,33   | 2,33 |
| Pimozide         | 4,00    |        |       | 0,80   |        |      | 0,50   |        |      | 1,33   |        |      |
| Pipamperone      | 200,00  |        |       | 40,00  |        |      | 25,00  |        |      | 66,67  |        |      |
| Pipotiazine      | 10,00   |        | 5,00  | 2,00   |        | 1,00 | 1,25   |        | 0,63 | 3,33   |        | 1,67 |
| Prochlorperazine | 100,00  | 50,00  |       | 20,00  | 10,00  |      | 12,50  | 6,25   |      | 33,33  | 16,67  |      |
| Promazine        | 300,00  | 100,00 |       | 60,00  | 20,00  |      | 37,50  | 12,50  |      | 100,00 | 33,33  |      |
| Prothipendyl     | 240,00  | 240,00 |       | 48,00  | 48,00  |      | 30,00  | 30,00  |      | 80,00  | 80,00  |      |
| Quetiapine       | 400,00  |        |       | 80,00  |        |      | 50,00  |        |      | 133,33 |        |      |
| Remoxipride      | 300,00  | 300,00 |       | 60,00  | 60,00  |      | 37,50  | 37,50  |      | 100,00 | 100,00 |      |
| Risperidone      | 5,00    |        | 2,70  | 1,00   |        | 0,54 | 0,63   |        | 0,34 | 1,67   |        | 0,90 |
| Sertindole       | 16,00   |        |       | 3,20   |        |      | 2,00   |        |      | 5,33   |        |      |
| Sulpiride        | 800,00  | 800,00 |       | 160,00 | 160,00 |      | 100,00 | 100,00 |      | 266,67 | 266,67 |      |
| Sultopride       | 1200,00 |        |       | 240,00 |        |      | 150,00 |        |      | 400,00 |        |      |
| Thiopropazate    | 60,00   |        |       | 12,00  |        |      | 7,50   |        |      | 20,00  |        |      |

|                 |        |        |       |       |       |      |       |       |      |        |        |      |
|-----------------|--------|--------|-------|-------|-------|------|-------|-------|------|--------|--------|------|
| Thiopropazine   | 75,00  | 20,00  |       | 15,00 | 4,00  |      | 9,38  | 2,50  |      | 25,00  | 6,67   |      |
| Thioridazine    | 300,00 |        |       | 60,00 |       |      | 37,50 |       |      | 100,00 |        |      |
| Tiapride        | 400,00 | 400,00 |       | 80,00 | 80,00 |      | 50,00 | 50,00 |      | 133,33 | 133,33 |      |
| Tiotixene       | 30,00  |        |       | 6,00  |       |      | 3,75  |       |      | 10,00  |        |      |
| Trifluoperazine | 20,00  | 8,00   |       | 4,00  | 1,60  |      | 2,50  | 1,00  |      | 6,67   | 2,67   |      |
| trifluoperidol  | 2,00   |        |       | 0,40  |       |      | 0,25  |       |      | 0,67   |        |      |
| Triflupromazine | 100,00 | 100,00 |       | 20,00 | 20,00 |      | 12,50 | 12,50 |      | 33,33  | 33,33  |      |
| Veralipride     |        |        |       |       |       |      |       |       |      |        |        |      |
| Ziprasidone     | 80,00  | 40,00  |       | 16,00 | 8,00  |      | 10,00 | 5,00  |      | 26,67  | 13,33  |      |
| Zotepine        | 200,00 |        |       | 40,00 |       |      | 25,00 |       |      | 66,67  |        |      |
| Zuclopenthixol  | 30,00  | 30,00  | 15,00 | 6,00  | 6,00  | 3,00 | 3,75  | 3,75  | 1,88 | 10,00  | 10,00  | 5,00 |

DDD = defined daily doses, CPZ = chlorpromazine, HAL = haloperidol, RIS = risperidone

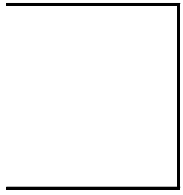

Supplement: supp_sbv167_Antipsychotic_dose_conversion_sheet_Schizophrenia_Bulletin.pdf [file supp_sbv167_Antipsychotic_dose_conversion_sheet_Schizophrenia_Bulletin.pdf]
